# Supplementary material for: OrthoID: profiling dynamic proteomes through time and space using mutually orthogonal chemical tools
Source: Springer Nature journal article supplement (doi:10.1038/s41467-024-46034-z), 2024-02-29
Supplement: 41467_2024_46034_MOESM3_ESM.pdf [file 41467_2024_46034_MOESM3_ESM.pdf]

## **DESCRIPTION OF ADDITIONAL SUPPLEMENTARY FILES DOCUMENT**

**Supplementary Data 1:** OrthoID results using model proteins

**Supplementary Data 2:** OrthoID results using stable cells

**Supplementary Data 3:** Topology analysis of the membrane proteins identified in OrthoID

**Supplementary Data 4:** OrthoID results using CCCP-treated stable cells

**Supplementary Data 5:** Comparison of identified PSMs in OrthoID between non-treated and CCCPtreated stable cells
